# Supplementary material
Source: publisher site journal article supplement (https://www.spandidos-publications.com/8000/downloadSupplementary)
Supplement: Supplementary file 1 [file downloadSupplementary]

## Sheet: Sheet1
Table SI. Genes for tumor NGS screening
Type of cancer	Gene name
Lung (n=50)	ALK
	EGFR
	KRAS
	BRAF
	ERBB2
	RET
	MET
	ROS
	NTRK1
	NTRK3
	AKT1
	CDKN2A
	DDR2
	FBXW7
	FGFR1
	FGFR3
	HRAS
	KDR
	MAPK1
	NF1
	NFE2L2
	NRAS
	PIK3CA
	PTEN
	STK11
	TP53
	VEGFA
	APC
	ARID1B
	ATM
	BCL2L11
	CHEK2
	CTNNB1
	EPHA3
	EPHA5
	ERBB4
	FGFR2
	FGFR4
	IGF1R
	KEAP1
	KIT
	MAP2K1
	MST1R
	PDGFRA
	NOTCH1
	PTPRD
	RB1
	SMAD4
	TOP1
	U2AF1
Bowel (n=23)	KRAS
	AKT1
	MET
	APC
	NRAS
	ALK
	MLH1
	SMAD4
	BRAF
	CDKN2A
	PIK3CA
	NOTCH1
	ERBB2
	EGFR
	PTEN
	STK11
	NTRK1
	FBXW7
	TP53
	DDR2
	NTRK3
	HRAS
	MAP2K1
